# Supplementary material
Source: publisher site journal article supplement (https://www.dovepress.com/article/375155)
Supplement: Supplementary file 1 [file get_supplementary_file.php]

**Supplementary Material**

**The complete form of the questionnaire used for data collection**

Questionnaire prepared to evaluate dispensing practices and subsequent quality of pharmaceutical service in different drug retail outlets of four Southern Towns of Ethiopia.

**Part I: Socio-demographic characters**

1. Age: 18-25 years ——— 25-35 years ——— 35-60 years ———

2. Sex: A. Male ———— B. Female ————

3. Ethnicity: A. Oromo B. Amhara C. Tigre D. Other (specify) _______

4. Religion: A. Orthodox B. Protestant. C. Muslim D. Other (specify) ________

5. Educational level/ qualification?

A. Pharmacist B. Druggist C. Pharmacy technician F. other (specify) _________

6. Working experience:

A. 1-5 years ———— B.5-10 years ———— C. 10-20 years ————

D. 20-30 years ———— E. >30__________

**Part II: Availability the necessary facility and infrastructure**

7. How many employees do you have in your Retail Pharmacy and what is their qualification?

8. The level of premise working in?

A. Pharmacy B. Drug store C. Other (specify) ___________

9. The type of the pharmaceutical sector

A. Government B. Private C. NGOs D. Other (specify) ___________

10. Is there telephone service? A .Yes B. No

11. Is there electric supply? A. Yes B. No

12. Is there refrigerator? A. Yes B. No

13. Is there thermometer? A. Yes B. No

14. Is there potable water supply? A. Yes B. No

15. Where is your drug source (suppliers)?

A. Government e.g. PFSA B. Private whole sellers C.NGOs D .Other (specify) ______

16. How drugs are arranged? A .Alphabetical C. Dosage form

B .Pharmacological D. Chemical name

17. For how long (months or years) do you keep (file) prescription papers for?

Narcotic and psychotropic prescription _____________

Ordinary prescription _________________

There is no filling system in pharmacy __________________

18. What do you do after the date of keeping prescription papers is expired for Q 17?________

**Part III: Knowledge and experience on dispensing practice**

19. Do you have Good dispensing manual? A. yes B. No

20. Do you have EDL, STG. Formulary, etc? A. Yes B. No

21. Do you have list of over the counter (OTC) drugs? A. Yes B. No

22. Do you update yourself in searching for recent information regarding drugs?

A. Yes B. No

23. If Q22 is yes, which information source did you use?

A. Standard reference books

B. Periodical bulletins from EFDA D. Internet

C. Medical and pharmaceutical journals E. Another (Specify)_________________

24. Do you dispense prescribed drugs after 15 days? A. Yes B. No

25. How often you dispensed prescription drugs without prescription?

A. Always B. Sometimes C. Never

26. When the prescription comes with generic name which drug product do you often dispense?

A. The written generic product only

B .Any alternative brand produces C. Other, specify ___________________

27. In the prescription come with brand product which drug do you often dispense?

A. its generic product only C. Any alternative brand products

B. the written brand product only

28. Have you ever encountered any prescription error? A. Yes B. No

29. If Q 28 is yes type of error you encountered?

A. Illegible prescription D. legality problems

B. incomplete prescription E. other, specify_____________

C. Containing drugs which interact

30. What measure have you taken for the prescription error you encountered?

A. dispensed by guess

B. makes correction by communicating with the patient

C. check for reference books (if needed)

D. Communicate with the prescriber back

31. When do you count tablets and capsules for pacing?

A. when the patient comes B. when there is no patient C. outside working time

32. How do you count tablets and capsules that are not packed by the manufacture?

A. By hand B. By piece of paper C. Spoon D. Other, (specify) _____________

33. Where do you keep spoons?

A. in the container of pharmaceuticals C. in the separate enclosed area

B. on the open area such as tables D. other, (specify) __________________

34. What drug information you mostly provide to patient during dispensing? _______________

35. How often you read the container labels? A. once B. Twice C. 3 times D. more than 3 times

36. Do you label? A. Yes B. No

37. What are the labels you mostly write on the containers of dispensed drugs?

38. For which type of patients do you write labels on the dispensed drugs?

A. Literate B. Illiterate C. Both

39. Which labeling system do you follow when dispensing to illiterate patients?

A. writing in words and / or numbers C. use of pictograms

B. No need of labeling, only oral information is enough D. other, (specify) _______

40. List of essential drugs available________________________

41. Which essential drug is highly demanded by your client but not available at all times?_____

42. Do you know that the presence of regulatory body and governing policies of drugs?

A. Yes B. No

43. Have you recently encountered regulatory body for inspection of pharmacy activities?

A. Yes B. No

44. If Q43 is yes, please specify the regulatory body and when? _____________________
